# Supplementary material for: Effect of Pesticide and Humic Preparation on the Soil Structure during Pea and Chickpea Cultivation
Source: MDPI journal article supplement (doi:10.3390/agronomy11102053), 2021-10-13
Supplement: s1 [file s1]

Supplementary Table S1.

The results of ANOVA for the numbers of bacteria in the soils of experimental plots in 2019 before and after the treatment

| Copiotrophic bacteria |       |         |        |          |         |           |       |         |        |          |         |           |
|-----------------------|-------|---------|--------|----------|---------|-----------|-------|---------|--------|----------|---------|-----------|
|                       | C (1) | C+H (1) | CF (1) | CF+H (1) | CHF (1) | CHF+H (1) | C (2) | C+H (2) | CF (2) | CF+H (2) | CHF (2) | CHF+H (2) |
| C (1)                 |       | 0,699   | 1,000  | 0,633    | 1,000   | 0,999     | 0,001 | 0,001   | 1,000  | 0,715    | 0,441   | 0,015     |
| C+H (1)               | 0,699 |         | 0,977  | 1,000    | 0,695   | 0,991     | 0,000 | 0,000   | 0,837  | 0,024    | 0,009   | 0,000     |
| CF (1)                | 1,000 | 0,977   |        | 0,959    | 1,000   | 1,000     | 0,000 | 0,000   | 1,000  | 0,294    | 0,134   | 0,003     |
| CF+H (1)              | 0,633 | 1,000   | 0,959  |          | 0,629   | 0,981     | 0,000 | 0,000   | 0,782  | 0,019    | 0,007   | 0,000     |
| CHF (1)               | 1,000 | 0,695   | 1,000  | 0,629    |         | 0,999     | 0,001 | 0,001   | 1,000  | 0,718    | 0,444   | 0,015     |
| CHF+H (1)             | 0,999 | 0,991   | 1,000  | 0,981    | 0,999   |           | 0,000 | 0,000   | 1,000  | 0,231    | 0,101   | 0,002     |
| C (2)                 | 0,001 | 0,000   | 0,000  | 0,000    | 0,001   | 0,000     |       | 1,000   | 0,001  | 0,097    | 0,223   | 0,992     |
| C+H (2)               | 0,001 | 0,000   | 0,000  | 0,000    | 0,001   | 0,000     | 1,000 |         | 0,000  | 0,052    | 0,129   | 0,953     |
| CF (2)                | 1,000 | 0,837   | 1,000  | 0,782    | 1,000   | 1,000     | 0,001 | 0,000   |        | 0,559    | 0,306   | 0,008     |
| CF+H (2)              | 0,715 | 0,024   | 0,294  | 0,019    | 0,718   | 0,231     | 0,097 | 0,052   | 0,559  |          | 1,000   | 0,572     |
| CHF (2)               | 0,441 | 0,009   | 0,134  | 0,007    | 0,444   | 0,101     | 0,223 | 0,129   | 0,306  | 1,000    |         | 0,831     |
| CHF+H (2)             | 0,015 | 0,000   | 0,003  | 0,000    | 0,015   | 0,002     | 0,992 | 0,953   | 0,008  | 0,572    | 0,831   |           |
| Prototrophic bacteria |       |         |        |          |         |           |       |         |        |          |         |           |
|                       | C (1) | C+H (1) | CF (1) | CF+H (1) | CHF (1) | CHF+H (1) | C (2) | C+H (2) | CF (2) | CF+H (2) | CHF (2) | CHF+H (2) |
| C (1)                 |       | 0,871   | 0,661  | 0,851    | 0,486   | 0,758     | 0,057 | 0,003   | 0,000  | 0,008    | 0,001   | 0,111     |
| C+H (1)               | 0,871 |         | 1,000  | 1,000    | 1,000   | 1,000     | 0,755 | 0,119   | 0,002  | 0,257    | 0,057   | 0,906     |
| CF (1)                | 0,661 | 1,000   |        | 1,000    | 1,000   | 1,000     | 0,927 | 0,243   | 0,006  | 0,460    | 0,127   | 0,986     |
| CF+H (1)              | 0,851 | 1,000   | 1,000  |          | 1,000   | 1,000     | 0,780 | 0,130   | 0,003  | 0,277    | 0,063   | 0,921     |
| CHF (1)               | 0,486 | 1,000   | 1,000  | 1,000    |         | 1,000     | 0,982 | 0,378   | 0,011  | 0,634    | 0,213   | 0,999     |
| CHF+H (1)             | 0,758 | 1,000   | 1,000  | 1,000    | 1,000   |           | 0,868 | 0,183   | 0,004  | 0,367    | 0,092   | 0,965     |
| C (2)                 | 0,057 | 0,755   | 0,927  | 0,780    | 0,982   | 0,868     |       | 0,972   | 0,149  | 0,999    | 0,872   | 1,000     |
| C+H (2)               | 0,003 | 0,119   | 0,243  | 0,130    | 0,378   | 0,183     | 0,972 |         | 0,816  | 1,000    | 1,000   | 0,885     |
| CF (2)                | 0,000 | 0,002   | 0,006  | 0,003    | 0,011   | 0,004     | 0,149 | 0,816   |        | 0,566    | 0,949   | 0,078     |
| CF+H (2)              | 0,008 | 0,257   | 0,460  | 0,277    | 0,634   | 0,367     | 0,999 | 1,000   | 0,566  |          | 1,000   | 0,984     |
| CHF (2)               | 0,001 | 0,057   | 0,127  | 0,063    | 0,213   | 0,092     | 0,872 | 1,000   | 0,949  | 1,000    |         | 0,702     |

| CHF+H (2)              | 0,111 | 0,906   | 0,986  | 0,921    | 0,999   | 0,965     | 1,000 | 0,885   | 0,078  | 0,984    | 0,702   |           |
|------------------------|-------|---------|--------|----------|---------|-----------|-------|---------|--------|----------|---------|-----------|
| Actinomycetes          |       |         |        |          |         |           |       |         |        |          |         |           |
|                        | C (1) | C+H (1) | CF (1) | CF+H (1) | CHF (1) | CHF+H (1) | C (2) | C+H (2) | CF (2) | CF+H (2) | CHF (2) | CHF+H (2) |
| C (1)                  |       | 1,000   | 0,952  | 0,510    | 1,000   | 0,847     | 1,000 | 0,997   | 0,997  | 0,107    | 0,495   | 0,491     |
| C+H (1)                | 1,000 |         | 0,996  | 0,754    | 1,000   | 0,624     | 0,996 | 0,958   | 0,962  | 0,047    | 0,280   | 0,277     |
| CF (1)                 | 0,952 | 0,996   |        | 0,999    | 0,977   | 0,137     | 0,683 | 0,453   | 0,466  | 0,005    | 0,040   | 0,039     |
| CF+H (1)               | 0,510 | 0,754   | 0,999  |          | 0,599   | 0,021     | 0,204 | 0,101   | 0,106  | 0,001    | 0,005   | 0,005     |
| CHF (1)                | 1,000 | 1,000   | 0,977  | 0,599    |         | 0,776     | 1,000 | 0,990   | 0,992  | 0,080    | 0,411   | 0,408     |
| CHF+H (1)              | 0,847 | 0,624   | 0,137  | 0,021    | 0,776   |           | 0,992 | 1,000   | 1,000  | 0,917    | 1,000   | 1,000     |
| C (2)                  | 1,000 | 0,996   | 0,683  | 0,204    | 1,000   | 0,992     |       | 1,000   | 1,000  | 0,316    | 0,850   | 0,847     |
| C+H (2)                | 0,997 | 0,958   | 0,453  | 0,101    | 0,990   | 1,000     | 1,000 |         | 1,000  | 0,526    | 0,966   | 0,965     |
| CF (2)                 | 0,997 | 0,962   | 0,466  | 0,106    | 0,992   | 1,000     | 1,000 | 1,000   |        | 0,513    | 0,962   | 0,961     |
| CF+H (2)               | 0,107 | 0,047   | 0,005  | 0,001    | 0,080   | 0,917     | 0,316 | 0,526   | 0,513  |          | 0,998   | 0,998     |
| CHF (2)                | 0,495 | 0,280   | 0,040  | 0,005    | 0,411   | 1,000     | 0,850 | 0,966   | 0,962  | 0,998    |         | 1,000     |
| CHF+H (2)              | 0,491 | 0,277   | 0,039  | 0,005    | 0,408   | 1,000     | 0,847 | 0,965   | 0,961  | 0,998    | 1,000   |           |
| Spore-forming bacteria |       |         |        |          |         |           |       |         |        |          |         |           |
|                        | C (1) | C+H (1) | CF (1) | CF+H (1) | CHF (1) | CHF+H (1) | C (2) | C+H (2) | CF (2) | CF+H (2) | CHF (2) | CHF+H (2) |
| C (1)                  |       | 0,835   | 0,989  | 1,000    | 0,963   | 0,721     | 0,999 | 1,000   | 0,095  | 0,973    | 1,000   | 0,999     |
| C+H (1)                | 0,835 |         | 0,211  | 0,968    | 0,144   | 0,042     | 0,362 | 0,779   | 0,002  | 0,162    | 0,522   | 0,367     |
| CF (1)                 | 0,989 | 0,211   |        | 0,909    | 1,000   | 0,999     | 1,000 | 0,995   | 0,591  | 1,000    | 1,000   | 1,000     |
| CF+H (1)               | 1,000 | 0,968   | 0,909  |          | 0,821   | 0,464     | 0,982 | 1,000   | 0,040  | 0,851    | 0,998   | 0,983     |
| CHF (1)                | 0,963 | 0,144   | 1,000  | 0,821    |         | 1,000     | 1,000 | 0,979   | 0,720  | 1,000    | 0,999   | 1,000     |
| CHF+H (1)              | 0,721 | 0,042   | 0,999  | 0,464    | 1,000   |           | 0,989 | 0,782   | 0,963  | 1,000    | 0,949   | 0,988     |
| C (2)                  | 0,999 | 0,362   | 1,000  | 0,982    | 1,000   | 0,989     |       | 1,000   | 0,390  | 1,000    | 1,000   | 1,000     |
| C+H (2)                | 1,000 | 0,779   | 0,995  | 1,000    | 0,979   | 0,782     | 1,000 |         | 0,118  | 0,986    | 1,000   | 1,000     |
| CF (2)                 | 0,095 | 0,002   | 0,591  | 0,040    | 0,720   | 0,963     | 0,390 | 0,118   |        | 0,682    | 0,255   | 0,385     |
| CF+H (2)               | 0,973 | 0,162   | 1,000  | 0,851    | 1,000   | 1,000     | 1,000 | 0,986   | 0,682  |          | 1,000   | 1,000     |
| CHF (2)                | 1,000 | 0,522   | 1,000  | 0,998    | 0,999   | 0,949     | 1,000 | 1,000   | 0,255  | 1,000    |         | 1,000     |
| CHF+H (2)              | 0,999 | 0,367   | 1,000  | 0,983    | 1,000   | 0,988     | 1,000 | 1,000   | 0,385  | 1,000    | 1,000   |           |
| Fungi                  |       |         |        |          |         |           |       |         |        |          |         |           |

|           | C (1) | C+H (1) | CF (1) | CF+H (1) | CHF (1) | CHF+H (1) | C (2) | C+H (2) | CF (2) | CF+H (2) | CHF (2) | CHF+H (2) |
|-----------|-------|---------|--------|----------|---------|-----------|-------|---------|--------|----------|---------|-----------|
| C (1)     |       | 0,999   | 0,376  | 0,005    | 0,645   | 1,000     | 0,000 | 0,613   | 0,729  | 0,000    | 0,003   | 0,000     |
| C+H (1)   | 0,999 |         | 0,845  | 0,033    | 0,976   | 1,000     | 0,000 | 0,968   | 0,990  | 0,001    | 0,017   | 0,000     |
| CF (1)    | 0,376 | 0,845   |        | 0,642    | 1,000   | 0,775     | 0,009 | 1,000   | 1,000  | 0,029    | 0,462   | 0,005     |
| CF+H (1)  | 0,005 | 0,033   | 0,642  |          | 0,373   | 0,025     | 0,509 | 0,401   | 0,302  | 0,816    | 1,000   | 0,370     |
| CHF (1)   | 0,645 | 0,976   | 1,000  | 0,373    |         | 0,951     | 0,003 | 1,000   | 1,000  | 0,011    | 0,236   | 0,002     |
| CHF+H (1) | 1,000 | 1,000   | 0,775  | 0,025    | 0,951   |           | 0,000 | 0,938   | 0,976  | 0,000    | 0,013   | 0,000     |
| C (2)     | 0,000 | 0,000   | 0,009  | 0,509    | 0,003   | 0,000     |       | 0,004   | 0,002  | 1,000    | 0,690   | 1,000     |
| C+H (2)   | 0,613 | 0,968   | 1,000  | 0,401    | 1,000   | 0,938     | 0,004 |         | 1,000  | 0,012    | 0,257   | 0,002     |
| CF (2)    | 0,729 | 0,990   | 1,000  | 0,302    | 1,000   | 0,976     | 0,002 | 1,000   |        | 0,008    | 0,185   | 0,001     |
| CF+H (2)  | 0,000 | 0,001   | 0,029  | 0,816    | 0,011   | 0,000     | 1,000 | 0,012   | 0,008  |          | 0,931   | 1,000     |
| CHF (2)   | 0,003 | 0,017   | 0,462  | 1,000    | 0,236   | 0,013     | 0,690 | 0,257   | 0,185  | 0,931    |         | 0,540     |
| CHF+H (2) | 0,000 | 0,000   | 0,005  | 0,370    | 0,002   | 0,000     | 1,000 | 0,002   | 0,001  | 1,000    | 0,540   |           |

Supplementary Table S2.

The results of ANOVA for the numbers of bacteria in the soils of experimental plots in 2020 before and after the treatment

| Copiotrophic bacteria |       |         |        |          |         |           |       |         |        |          |         |           |
|-----------------------|-------|---------|--------|----------|---------|-----------|-------|---------|--------|----------|---------|-----------|
|                       | C (1) | C+H (1) | CF (1) | CF+H (1) | CHF (1) | CHF+H (1) | C (2) | C+H (2) | CF (2) | CF+H (2) | CHF (2) | CHF+H (2) |
| C (1)                 |       | 0,000   | 0,014  | 1,000    | 0,825   | 0,011     | 0,979 | 0,000   | 0,000  | 0,026    | 0,000   | 0,000     |
| C+H (1)               | 0,000 |         | 0,290  | 0,000    | 0,002   | 0,336     | 0,001 | 0,000   | 1,000  | 0,184    | 0,002   | 0,333     |
| CF (1)                | 0,014 | 0,290   |        | 0,024    | 0,430   | 1,000     | 0,192 | 0,000   | 0,096  | 1,000    | 0,000   | 0,001     |
| CF+H (1)              | 1,000 | 0,000   | 0,024  |          | 0,922   | 0,020     | 0,996 | 0,000   | 0,000  | 0,044    | 0,000   | 0,000     |
| CHF (1)               | 0,825 | 0,002   | 0,430  | 0,922    |         | 0,378     | 1,000 | 0,000   | 0,000  | 0,594    | 0,000   | 0,000     |
| CHF+H (1)             | 0,011 | 0,336   | 1,000  | 0,020    | 0,378   |           | 0,162 | 0,000   | 0,116  | 1,000    | 0,000   | 0,001     |
| C (2)                 | 0,979 | 0,001   | 0,192  | 0,996    | 1,000   | 0,162     |       | 0,000   | 0,000  | 0,301    | 0,000   | 0,000     |
| C+H (2)               | 0,000 | 0,000   | 0,000  | 0,000    | 0,000   | 0,000     | 0,000 |         | 0,001  | 0,000    | 1,000   | 0,111     |
| CF (2)                | 0,000 | 1,000   | 0,096  | 0,000    | 0,000   | 0,116     | 0,000 | 0,001   |        | 0,055    | 0,007   | 0,694     |
| CF+H (2)              | 0,026 | 0,184   | 1,000  | 0,044    | 0,594   | 1,000     | 0,301 | 0,000   | 0,055  |          | 0,000   | 0,001     |
| CHF (2)               | 0,000 | 0,002   | 0,000  | 0,000    | 0,000   | 0,000     | 0,000 | 1,000   | 0,007  | 0,000    |         | 0,399     |
| CHF+H (2)             | 0,000 | 0,333   | 0,001  | 0,000    | 0,000   | 0,001     | 0,000 | 0,111   | 0,694  | 0,001    | 0,399   |           |
| Prototrophic bacteria |       |         |        |          |         |           |       |         |        |          |         |           |
|                       | C (1) | C+H (1) | CF (1) | CF+H (1) | CHF (1) | CHF+H (1) | C (2) | C+H (2) | CF (2) | CF+H (2) | CHF (2) | CHF+H (2) |
| C (1)                 |       | 0,000   | 0,962  | 1,000    | 1,000   | 0,417     | 0,045 | 0,000   | 0,001  | 0,022    | 0,000   | 0,000     |
| C+H (1)               | 0,000 |         | 0,001  | 0,000    | 0,000   | 0,016     | 0,204 | 0,872   | 0,988  | 0,348    | 0,236   | 1,000     |
| CF (1)                | 0,962 | 0,001   |        | 1,000    | 0,992   | 0,992     | 0,504 | 0,000   | 0,019  | 0,320    | 0,000   | 0,001     |
| CF+H (1)              | 1,000 | 0,000   | 1,000  |          | 1,000   | 0,821     | 0,177 | 0,000   | 0,004  | 0,094    | 0,000   | 0,000     |
| CHF (1)               | 1,000 | 0,000   | 0,992  | 1,000    |         | 0,570     | 0,077 | 0,000   | 0,002  | 0,038    | 0,000   | 0,000     |
| CHF+H (1)             | 0,417 | 0,016   | 0,992  | 0,821    | 0,570   |           | 0,983 | 0,000   | 0,186  | 0,915    | 0,000   | 0,015     |
| C (2)                 | 0,045 | 0,204   | 0,504  | 0,177    | 0,077   | 0,983     |       | 0,006   | 0,834  | 1,000    | 0,000   | 0,186     |
| C+H (2)               | 0,000 | 0,872   | 0,000  | 0,000    | 0,000   | 0,000     | 0,006 |         | 0,236  | 0,013    | 0,988   | 0,892     |
| CF (2)                | 0,001 | 0,988   | 0,019  | 0,004    | 0,002   | 0,186     | 0,834 | 0,236   |        | 0,950    | 0,022   | 0,983     |
| CF+H (2)              | 0,022 | 0,348   | 0,320  | 0,094    | 0,038   | 0,915     | 1,000 | 0,013   | 0,950  |          | 0,001   | 0,322     |
| CHF (2)               | 0,000 | 0,236   | 0,000  | 0,000    | 0,000   | 0,000     | 0,000 | 0,988   | 0,022  | 0,001    |         | 0,257     |

|                        |       |         |        |          |         |           |       |         |        |          |         |           |
|------------------------|-------|---------|--------|----------|---------|-----------|-------|---------|--------|----------|---------|-----------|
| CHF+H (2)              | 0,000 | 1,000   | 0,001  | 0,000    | 0,000   | 0,015     | 0,186 | 0,892   | 0,983  | 0,322    | 0,257   |           |
| Actinomycetes          |       |         |        |          |         |           |       |         |        |          |         |           |
|                        | C (1) | C+H (1) | CF (1) | CF+H (1) | CHF (1) | CHF+H (1) | C (2) | C+H (2) | CF (2) | CF+H (2) | CHF (2) | CHF+H (2) |
| C (1)                  |       | 0,851   | 0,930  | 1,000    | 0,610   | 0,003     | 1,000 | 1,000   | 0,998  | 0,859    | 1,000   | 1,000     |
| C+H (1)                | 0,851 |         | 1,000  | 0,994    | 1,000   | 0,118     | 0,978 | 0,991   | 1,000  | 1,000    | 0,846   | 0,890     |
| CF (1)                 | 0,930 | 1,000   |        | 0,999    | 1,000   | 0,077     | 0,995 | 0,999   | 1,000  | 1,000    | 0,927   | 0,954     |
| CF+H (1)               | 1,000 | 0,994   | 0,999  |          | 0,930   | 0,012     | 1,000 | 1,000   | 1,000  | 0,995    | 1,000   | 1,000     |
| CHF (1)                | 0,610 | 1,000   | 1,000  | 0,930    |         | 0,255     | 0,861 | 0,917   | 0,982  | 1,000    | 0,604   | 0,669     |
| CHF+H (1)              | 0,003 | 0,118   | 0,077  | 0,012    | 0,255   |           | 0,008 | 0,011   | 0,022  | 0,113    | 0,003   | 0,003     |
| C (2)                  | 1,000 | 0,978   | 0,995  | 1,000    | 0,861   | 0,008     |       | 1,000   | 1,000  | 0,980    | 1,000   | 1,000     |
| C+H (2)                | 1,000 | 0,991   | 0,999  | 1,000    | 0,917   | 0,011     | 1,000 |         | 1,000  | 0,992    | 1,000   | 1,000     |
| CF (2)                 | 0,998 | 1,000   | 1,000  | 1,000    | 0,982   | 0,022     | 1,000 | 1,000   |        | 1,000    | 0,998   | 0,999     |
| CF+H (2)               | 0,859 | 1,000   | 1,000  | 0,995    | 1,000   | 0,113     | 0,980 | 0,992   | 1,000  |          | 0,855   | 0,897     |
| CHF (2)                | 1,000 | 0,846   | 0,927  | 1,000    | 0,604   | 0,003     | 1,000 | 1,000   | 0,998  | 0,855    |         | 1,000     |
| CHF+H (2)              | 1,000 | 0,890   | 0,954  | 1,000    | 0,669   | 0,003     | 1,000 | 1,000   | 0,999  | 0,897    | 1,000   |           |
| Spore-forming bacteria |       |         |        |          |         |           |       |         |        |          |         |           |
|                        | C (1) | C+H (1) | CF (1) | CF+H (1) | CHF (1) | CHF+H (1) | C (2) | C+H (2) | CF (2) | CF+H (2) | CHF (2) | CHF+H (2) |
| C (1)                  |       | 0,006   | 1,000  | 0,423    | 0,006   | 0,346     | 0,002 | 0,074   | 0,217  | 0,000    | 0,000   | 0,000     |
| C+H (1)                | 0,006 |         | 0,016  | 0,614    | 1,000   | 0,702     | 1,000 | 0,990   | 0,855  | 0,001    | 0,047   | 0,769     |
| CF (1)                 | 1,000 | 0,016   |        | 0,684    | 0,017   | 0,596     | 0,006 | 0,170   | 0,421  | 0,000    | 0,000   | 0,000     |
| CF+H (1)               | 0,423 | 0,614   | 0,684  |          | 0,632   | 1,000     | 0,361 | 0,997   | 1,000  | 0,000    | 0,000   | 0,022     |
| CHF (1)                | 0,006 | 1,000   | 0,017  | 0,632    |         | 0,718     | 1,000 | 0,992   | 0,867  | 0,001    | 0,044   | 0,753     |
| CHF+H (1)              | 0,346 | 0,702   | 0,596  | 1,000    | 0,718   |           | 0,440 | 0,999   | 1,000  | 0,000    | 0,001   | 0,030     |
| C (2)                  | 0,002 | 1,000   | 0,006  | 0,361    | 1,000   | 0,440     |       | 0,909   | 0,618  | 0,003    | 0,112   | 0,943     |
| C+H (2)                | 0,074 | 0,990   | 0,170  | 0,997    | 0,992   | 0,999     | 0,909 |         | 1,000  | 0,000    | 0,004   | 0,171     |
| CF (2)                 | 0,217 | 0,855   | 0,421  | 1,000    | 0,867   | 1,000     | 0,618 | 1,000   |        | 0,000    | 0,001   | 0,056     |
| CF+H (2)               | 0,000 | 0,001   | 0,000  | 0,000    | 0,001   | 0,000     | 0,003 | 0,000   | 0,000  |          | 0,905   | 0,087     |
| CHF (2)                | 0,000 | 0,047   | 0,000  | 0,000    | 0,044   | 0,001     | 0,112 | 0,004   | 0,001  | 0,905    |         | 0,816     |
| CHF+H (2)              | 0,000 | 0,769   | 0,000  | 0,022    | 0,753   | 0,030     | 0,943 | 0,171   | 0,056  | 0,087    | 0,816   |           |
| Fungi                  |       |         |        |          |         |           |       |         |        |          |         |           |

|           | C (1) | C+H (1) | CF (1) | CF+H (1) | CHF (1) | CHF+H (1) | C (2) | C+H (2) | CF (2) | CF+H (2) | CHF (2) | CHF+H (2) |
|-----------|-------|---------|--------|----------|---------|-----------|-------|---------|--------|----------|---------|-----------|
| C (1)     |       | 0,221   | 0,037  | 0,998    | 0,041   | 0,002     | 0,693 | 0,007   | 0,792  | 0,000    | 0,000   | 0,000     |
| C+H (1)   | 0,221 |         | 0,998  | 0,748    | 0,999   | 0,564     | 0,999 | 0,891   | 0,995  | 0,032    | 0,026   | 0,035     |
| CF (1)    | 0,037 | 0,998   |        | 0,241    | 1,000   | 0,971     | 0,825 | 1,000   | 0,731  | 0,197    | 0,170   | 0,212     |
| CF+H (1)  | 0,998 | 0,748   | 0,241  |          | 0,262   | 0,017     | 0,995 | 0,062   | 0,999  | 0,000    | 0,000   | 0,000     |
| CHF (1)   | 0,041 | 0,999   | 1,000  | 0,262    |         | 0,963     | 0,849 | 1,000   | 0,760  | 0,181    | 0,155   | 0,194     |
| CHF+H (1) | 0,002 | 0,564   | 0,971  | 0,017    | 0,963   |           | 0,152 | 1,000   | 0,109  | 0,888    | 0,853   | 0,903     |
| C (2)     | 0,693 | 0,999   | 0,825  | 0,995    | 0,849   | 0,152     |       | 0,407   | 1,000  | 0,004    | 0,004   | 0,005     |
| C+H (2)   | 0,007 | 0,891   | 1,000  | 0,062    | 1,000   | 1,000     | 0,407 |         | 0,315  | 0,559    | 0,507   | 0,585     |
| CF (2)    | 0,792 | 0,995   | 0,731  | 0,999    | 0,760   | 0,109     | 1,000 | 0,315   |        | 0,003    | 0,002   | 0,003     |
| CF+H (2)  | 0,000 | 0,032   | 0,197  | 0,000    | 0,181   | 0,888     | 0,004 | 0,559   | 0,003  |          | 1,000   | 1,000     |
| CHF (2)   | 0,000 | 0,026   | 0,170  | 0,000    | 0,155   | 0,853     | 0,004 | 0,507   | 0,002  | 1,000    |         | 1,000     |
| CHF+H (2) | 0,000 | 0,035   | 0,212  | 0,000    | 0,194   | 0,903     | 0,005 | 0,585   | 0,003  | 1,000    | 1,000   |           |

Supplementary Table S3.

The results of ANOVA for the structural quotient in the soils of experimental plots

| 2019  |       |       |       |       |       |       |
|-------|-------|-------|-------|-------|-------|-------|
|       | C     | C+H   | CF    | CF+H  | CHF   | CHF+H |
| C     |       | 0,935 | 0,471 | 0,039 | 0,144 | 0,755 |
| C+H   | 0,935 |       | 0,131 | 0,008 | 0,502 | 0,280 |
| CF    | 0,471 | 0,131 |       | 0,583 | 0,007 | 0,995 |
| CF+H  | 0,039 | 0,008 | 0,583 |       | 0,001 | 0,322 |
| CHF   | 0,144 | 0,502 | 0,007 | 0,001 |       | 0,015 |
| CHF+H | 0,755 | 0,280 | 0,995 | 0,322 | 0,015 |       |
| 2020  |       |       |       |       |       |       |
|       | C     | C+H   | CF    | CF+H  | CHF   | CHF+H |
| C     |       | 1,000 | 0,999 | 0,589 | 0,082 | 0,000 |
| C+H   | 1,000 |       | 0,999 | 0,601 | 0,085 | 0,000 |
| CF    | 0,999 | 0,999 |       | 0,781 | 0,143 | 0,000 |
| CF+H  | 0,589 | 0,601 | 0,781 |       | 0,718 | 0,001 |
| CHF   | 0,082 | 0,085 | 0,143 | 0,718 |       | 0,008 |
| CHF+H | 0,000 | 0,000 | 0,000 | 0,001 | 0,008 |       |

Supplementary Table S4.

The results of ANOVA for the water-resistance quotient in the soils of experimental plots

| 2019  |       |       |       |       |       |       |
|-------|-------|-------|-------|-------|-------|-------|
|       | C     | C+H   | CF    | CF+H  | CHF   | CHF+H |
| C     |       | 0,800 | 0,999 | 0,000 | 0,903 | 0,011 |
| C+H   | 0,800 |       | 0,612 | 0,000 | 0,274 | 0,001 |
| CF    | 0,999 | 0,612 |       | 0,000 | 0,982 | 0,019 |
| CF+H  | 0,000 | 0,000 | 0,000 |       | 0,000 | 0,055 |
| CHF   | 0,903 | 0,274 | 0,982 | 0,000 |       | 0,059 |
| CHF+H | 0,011 | 0,001 | 0,019 | 0,055 | 0,059 |       |
| 2020  |       |       |       |       |       |       |
|       | C     | C+H   | CF    | CF+H  | CHF   | CHF+H |
| C     |       | 0,000 | 0,003 | 0,492 | 0,003 | 1,000 |
| C+H   | 0,000 |       | 0,000 | 0,000 | 0,000 | 0,000 |
| CF    | 0,003 | 0,000 |       | 0,068 | 1,000 | 0,005 |
| CF+H  | 0,492 | 0,000 | 0,068 |       | 0,050 | 0,645 |
| CHF   | 0,003 | 0,000 | 1,000 | 0,050 |       | 0,004 |
| CHF+H | 1,000 | 0,000 | 0,005 | 0,645 | 0,004 |       |
